# Supplementary material for: Metal ion-coordinated carboxymethylated chitosan grafted carbon nanotubes with enhanced antibacterial properties
Source: Royal Society of Chemistry journal article supplement (doi:10.1039/c5ra21003h), 2015-12-11

## Metal ions-Coordinated Carboxymethylated Chitosans Grafted Carbon Nanotubes with Enhanced Antibacterial Properties

Xiangping Hao,<sup>a</sup> Shougang Chen,<sup>\*a</sup> Hui Yu,<sup>a</sup> Dan Liu,<sup>a</sup> and Weixiang Sun<sup>a</sup>

<sup>a</sup> Institute of Materials Science and Engineering, Ocean University of China, Qingdao 266100, PR China.

\* Corresponding author. Tel. and Fax: +86-0532-66781688, E-mail address: [sgchen@ouc.edu.cn](mailto:sgchen@ouc.edu.cn)

**Fig.S1** Photographs of MWCNT-CmCs after 5 month suspension in (a) aqueous solution, (b) DMSO; MWCNT after a half month suspension in (c) aqueous solution and (d) DMSO.

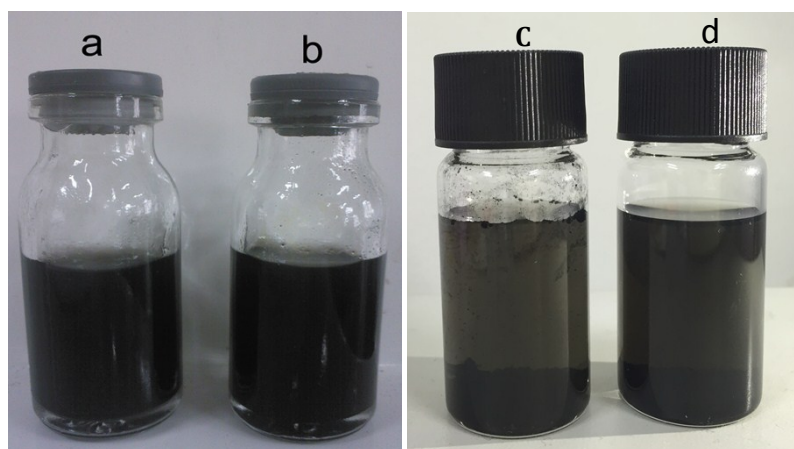

**Fig.S2** TGA traces of MWCNT-COOH (a), and MWCNT-CmCs (b)

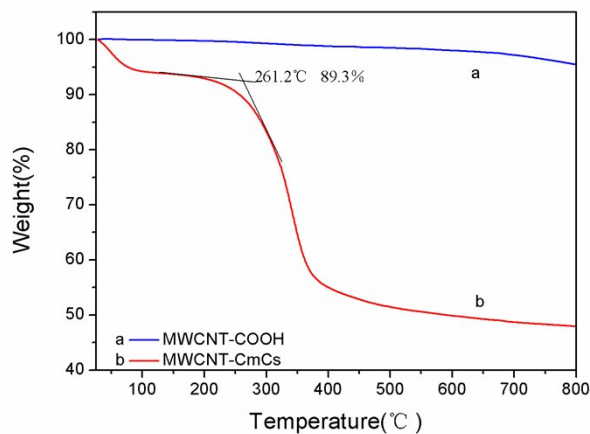

Supplement: c5ra21003h1.pdf [file c5ra21003h1.pdf]
